# Supplementary material for: Investigating Change in Student Financial Stress at a UK University: Multi-Year Survey Analysis across a Global Pandemic and Recession
Source: MDPI journal article supplement (doi:10.3390/educsci13121175), 2023-11-23
Supplement: s1 [file s1]

**Supplementary Files for Investigating change in student financial stress at a UK university: Multi-year survey analysis across a global pandemic and recession**

**Supplementary S1. Study questionnaire items (2022)**

What is your level of study?

*\*Undergraduate \*Postgraduate taught \*Postgraduate research*

What is your university fee status?

*\*Home/EU \*International \*Channel Islands & Isle of Man*

What is your ethnicity?

*\* Arab, \* Asian - Bangladeshi, \* Asian – Chinese \* Asian - Indian, \* Asian - Other, \* Asian – Pakistani,\* Black - African, \* Black - Caribbean, \* Black – Other, \* Gypsy or Traveller, \* White, \* White and Asian, \* White/Black African,\* White/Black Caribbean, \* Other,\* Other Mixed, \* Unknown, \* Prefer not to say*

How do you define your gender?

*\* Woman \* Man \* Non-binary \* Another gender \*Prefer not to Say*

How old are you?

What sort of school did you attend at secondary/high school level?

*\* State (non-fee paying) \* Grammar (non-fee paying) \* Private or grammar (fee paying) \* Other (please specify) (open text box)*

How much stress does your financial situation cause you?

*\*None \*Mild \*Moderate \*Severe \*Very severe*

Has a doctor, psychiatrist or other medical professional ever diagnosed you with a mental health condition?

*\*Yes \*No \*Prefer not to say*

**Supplementary S2. Missing data sensitivity analyses**

**Table S1.** Lifetime mental health non/missing responses in relation to other key factors in 2018.

|                                     | Lifetime mental health |                    |                    | All responses      |
|-------------------------------------|------------------------|--------------------|--------------------|--------------------|
|                                     | Missing                | Diagnosis          | No diagnosis       |                    |
| <i>n</i> = sample                   | ( <i>n</i> = 926)      | ( <i>n</i> = 1562) | ( <i>n</i> = 3074) | ( <i>n</i> = 5562) |
| <b>Gender, n (%)</b>                |                        |                    |                    |                    |
| Female                              | 580 (62.6)             | 1156 (74.0)        | 1878 (61.1)        | 3614 (65.0)        |
| Male                                | 314 (33.9)             | 356 (22.8)         | 1159 (37.7)        | 1829 (32.9)        |
| Non-binary or another               | 9 (1.0)                | 37 (2.4)           | 16 (0.5)           | 62 (1.1)           |
| Prefer not to say                   | 9 (1.0)                | 10 (0.6)           | 14 (0.5)           | 33 (0.6)           |
| Missing                             | 14 (1.5)               | 3 (0.3)            | 7 (0.2)            | 24 (0.4)           |
| <b>Fees status, n (%)</b>           |                        |                    |                    |                    |
| Home/EU                             | 826 (89.2)             | 1467 (93.9)        | 2827 (92.0)        | 5120 (92.1)        |
| International                       | 69 (7.5)               | 90 (5.8)           | 234 (7.6)          | 393 (7.1)          |
| Missing                             | 31 (3.4)               | 5 (0.3)            | 13 (0.4)           | 49 (0.9)           |
| <b>Previous education, n (%)</b>    |                        |                    |                    |                    |
| Non fee-paying e.g., state/ grammar | 507 (54.8)             | 990 (63.4)         | 1849 (60.2)        | 3346 (60.2)        |
| Fee-paying e.g., private/other      | 356 (38.4)             | 525 (33.6)         | 1147 (37.3)        | 2028 (36.5)        |
| Missing                             | 63 (6.8)               | 47 (3.0)           | 78 (2.5)           | 188 (3.4)          |
| <b>Financial Stress, n (%)</b>      |                        |                    |                    |                    |
| None                                | 1 (0.1)                | 299 (19.1)         | 876 (28.5)         | 1176 (21.1)        |
| Mild/Moderate/Severe/Very Severe    | 4 (0.4)                | 1206 (77.2)        | 1978 (64.4)        | 3188 (57.3)        |
| Missing                             | 921 (99.5)             | 57 (3.65)          | 220 (7.16)         | 1198 (21.5)        |

**Table S2.** Financial stress non/missing responses in relation to other key factors in 2018.

|                                   | <b>Financial Stress</b> |                    |                    | <b>All responses</b> |
|-----------------------------------|-------------------------|--------------------|--------------------|----------------------|
|                                   | <b>Missing</b>          | <b>None</b>        | <b>Some</b>        |                      |
| N = sample                        | ( <i>n</i> = 1198)      | ( <i>n</i> = 1176) | ( <i>n</i> = 3188) | ( <i>n</i> = 5562)   |
| <b>Gender, n (%)</b>              |                         |                    |                    |                      |
| Female                            | 714 (59.6)              | 715 (60.8)         | 2185 (68.5)        | 3614 (65.0)          |
| Male                              | 445 (37.2)              | 447 (38.0)         | 937 (29.4)         | 1829 (32.9)          |
| Nonbinary/another                 | 9 (0.8)                 | 9 (0.8)            | 44 (1.4)           | 62 (1.1)             |
| Prefer not to say                 | 12 (1.0)                | 3 (0.3)            | 18 (0.6)           | 33 (0.6)             |
| Missing                           | 18 (1.5)                | 2 (0.2)            | 4 (0.1)            | 24 (0.4)             |
| <b>Fees status, n (%)</b>         |                         |                    |                    |                      |
| Home/EU                           | 5120 (92.1)             | 1087 (92.4)        | 2969 (93.1)        | 5120 (92.1)          |
| International                     | 393 (7.1)               | 86 (7.3)           | 212 (6.7)          | 393 (7.1)            |
| Missing                           | 49 (0.8)                | 3 (0.3)            | 7 (0.2)            | 49 (0.9)             |
| <b>Previous education n (%)</b>   |                         |                    |                    |                      |
| Non-feepaying e.g., state/grammar | 655 (54.7)              | 592 (50.3)         | 2099 (65.9)        | 3346 (60.2)          |
| Feepaying e.g., private/other     | 470 (39.2)              | 558 (47.5)         | 1000 (31.4)        | 2028 (36.5)          |
| Missing                           | 73 (6.1)                | 26 (2.2)           | 89 (2.8)           | 188 (3.4)            |
| <b>Lifetime Diagnosis, n (%)</b>  |                         |                    |                    |                      |
| No diagnosis                      | 220 (18.4)              | 876 (74.5)         | 1978 (62.1)        | 3074 (55.3)          |
| Previously diagnosed              | 57 (4.8)                | 299 (25.4)         | 1206 (37.8)        | 1562 (28.1)          |
| Missing                           | 921 (76.9)              | 1 (0.1)            | 4 (0.1)            | 926 (16.7)           |
