# Supplementary material for: Investigating Change in Student Financial Stress at a UK University: Multi-Year Survey Analysis across a Global Pandemic and Recession
Source: MDPI journal article supplement (doi:10.3390/educsci13121175), 2023-11-23
Supplement: s1 [file s1]

Archive with 1 entries (1 files):
- education-2718713-supplementary.pdf
